# Supplementary material
Source: HighWire-hosted journal article supplement (https://erj.ersjournals.com/content/58/6/2003969)
Supplement: inline-supplementary-material-2 [file inline-supplementary-material-2.pdf]

Supplemental Tables

**Supplemental table S1:** Univariate analysis of association of clinical variables

| Variable                                  | CC    | p-value       |
|-------------------------------------------|-------|---------------|
| Sputum Eosinophils (log, percentage)      | 0.27  | <b>0.0007</b> |
| Exacerbations (no, one, > one)            | 0.25  | <b>0.0060</b> |
| Exhaled NO (log concentration, ppm)       | 0.20  | <b>0.0104</b> |
| Blood Eosinophils (log, absolute numbers) | 0.14  | 0.0704        |
| Gender (m/f)                              | 0.14  | 0.0709        |
| disease duration (log years)              | 0.14  | 0.0862        |
| Cummulative sIgE (log sum)                | 0.08  | n.s.          |
| Age (years)                               | 0.06  | n.s.          |
| Number of sensitisations                  | 0.05  | n.s.          |
| Atopy (y/n)                               | -0.03 | n.s.          |
| Systemic Corticosteroids (y/n)            | 0.03  | n.s.          |
| Smoking packyears (log years)             | -0.05 | n.s.          |
| Fluticasone Equivalent (log dose, mg)     | 0.00  | n.s.          |

CC =pairwise correlation coefficient; Exhaled NO = exhaled nitric oxide;

**Supplemental table S2:** Summary of Linear Regression Model:

| Variable                              | Estimate | SE    | t Ratio | p-value |
|---------------------------------------|----------|-------|---------|---------|
| Gender (m/f)                          | 0.769    | 0.208 | 3.71    | 0.0006* |
| disease duration (log years)          | 0.412    | 0.111 | 3.7     | 0.0006* |
| Exhaled NO (log concentration, ppm)   | 0.473    | 0.146 | 3.25    | 0.0023* |
| Atopy (y/n)                           | 0.832    | 0.300 | 2.78    | 0.0083* |
| Systemic Corticosteroids (y/n)        | 0.597    | 0.309 | 1.94    | 0.0599  |
| Smoking packyears (log years)         | 0.111    | 0.099 | 1.12    | 0.2696  |
| Sputum Eosinophils (log, percentage)  | 0.020    | 0.022 | 0.9     | 0.3746  |
| Age (years)                           | 0.002    | 0.009 | 0.2     | 0.8458  |
| Intercept                             | -0.100   | 1.262 | -0.08   | 0.9373  |
| Fluticasone Equivalent (log dose, mg) | -0.004   | 0.152 | -0.03   | 0.9799  |

\*indicates significant variable in linear regression model. SE = standard error of estimate;

Linear regression model characteristics:  $r^2=0.51$ ,  $p=0.0002$ . Exhaled NO = exhaled nitric oxide; Estimates indicate direction and quantity of effect size.

**Supplemental table S3:** Cystic Fibrosis Patients with and without allergic broncho-pulmonary aspergillosis:

| Cystic Fibrosis     | Allergic Broncho-Pulmonary Aspergillosis |              |
|---------------------|------------------------------------------|--------------|
|                     | Yes                                      | No           |
| N                   | 9                                        | 14           |
| Women (%)           | 66                                       | 43           |
| Age (years)         | 18.07 (7.93)*                            | 9.94 (9.94)  |
| FEV1% pred          | 61.89 (25.94)**                          | 97.5 (14.68) |
| IgE (IU/mL)         | 1481 (1246)***                           | 36 (50.83)   |
| Highest IgE (IU/mL) | 2394 (1433)****                          | 83 (137)     |

N = number, FEV1% = Forced expiratory volume in 1 second (percentage of predicted); IgE = total serum IgE; BMI = body mass index; \*\*\*\*p<0.0001, \*\*\*p<0.001, \*\*p<0.01, \*p<0.05 (yes vs. no; value in brackets are standard deviations).

**Supplemental table S4:** C4Ma3 baseline levels predict therapy response type:

| Responder Type          | Responder | Non-Responder          |
|-------------------------|-----------|------------------------|
| N                       | 10        | 9                      |
| Predicted Responder     | 9         | 2                      |
| Predicted Non-Responder | 1         | 7                      |
| Specificity             | 0.90      | 95% CI: 0.60 to 0.98   |
| Sensitivity             | 0.78      | 95% CI: 0.45 to 0.94   |
| DOR                     | 31.5      | 95% CI: 2.35 to 422.30 |

DOR: Diagnostic Odds Ratio.
