# Supplementary material
Source: HighWire-hosted journal article supplement (https://erj.ersjournals.com/content/58/6/2003969)
Supplement: inline-supplementary-material-3 [file inline-supplementary-material-3.pdf]

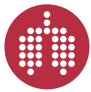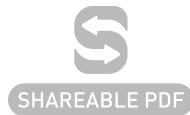

# COL4A3 is degraded in allergic asthma and degradation predicts response to anti-IgE therapy

Markus Weckmann <sup>1,2</sup>, Thomas Bahmer<sup>2,3</sup>, Jannie Marie Sand<sup>4</sup>, Sarah Rank Rønnow<sup>4,5</sup>, Martin Pech<sup>1,2</sup>, Cornelis Vermeulen <sup>6</sup>, Alen Faiz<sup>6,7,8,9</sup>, Diana Julie Leeming<sup>4</sup>, Morten Asser Karsdal<sup>5</sup>, Lars Lunding <sup>2,10</sup>, Brian George G. Oliver<sup>8,9</sup>, Michael Wegmann<sup>2,10</sup>, Gudrun Ulrich-Merzenich<sup>11</sup>, Uwe R. Juergens<sup>12</sup>, Jannis Duhn<sup>13</sup>, Yves Laumonnier<sup>13</sup>, Olga Danov<sup>14</sup>, Katherina Sewald<sup>14</sup>, Ulrich Zissler<sup>15</sup>, Marnix Jonker<sup>6,7</sup>, Inke König<sup>2,16</sup>, Gesine Hansen<sup>17,18</sup>, Erika von Mutius <sup>19,20</sup>, Oliver Fuchs <sup>1,2,21</sup>, Anna-Maria Dittrich<sup>17,18</sup>, Bianca Schaub<sup>19,20</sup>, Christine Happle<sup>17,18</sup>, Klaus F. Rabe<sup>2,3</sup>, Maarten van de Berge<sup>6</sup>, Janette Kay Burgess <sup>7,8,22</sup>, Matthias Volkmar Kopp<sup>1,2,21</sup> and the ALLIANCE Study Group as part of the German Centre for Lung Research (DZL)

<sup>1</sup>Division of Pediatric Pneumology and Allergology, University Medical Center Schleswig-Holstein, Lübeck, Germany. <sup>2</sup>Airway Research Center North (ARCN), Member of the German Center for Lung Research (DZL), Germany. <sup>3</sup>Dept of Pneumology, LungenClinic Grosshansdorf, Grosshansdorf, Germany. <sup>4</sup>Nordic Bioscience A/S, Herlev, Denmark. <sup>5</sup>University of Southern Denmark, The Faculty of Health Science, Odense, Denmark. <sup>6</sup>University of Groningen, University Medical Center Groningen, Dept of Pulmonary Diseases, GRIAC (Groningen Research Institute for Asthma and COPD), Groningen, The Netherlands. <sup>7</sup>University of Groningen, University Medical Center Groningen, Dept of Pathology and Medical Biology, GRIAC (Groningen Research Institute for Asthma and COPD), Groningen, The Netherlands. <sup>8</sup>Woolcock Institute of Medical Research, The University of Sydney, Glebe, Australia. <sup>9</sup>School of Medical and Molecular Biosciences, University of Technology, Sydney, Australia. <sup>10</sup>Division of Asthma-Exacerbation and -Regulation, Program Area Asthma and Allergy, Leibniz-Center for Medicine and Biosciences Borstel, Borstel, Germany. <sup>11</sup>AG Synergyresearch and Experimental Medicine, Medical Clinic III, University Hospital Bonn, Bonn, Germany. <sup>12</sup>Dept of Pneumology, Medical Clinic II, University Hospital Bonn, Bonn, Germany. <sup>13</sup>Institute for Systemic Inflammation Research, University of Lübeck, Lübeck, Germany. <sup>14</sup>Fraunhofer Institute for Toxicology and Experimental Medicine ITEM, Biomedical Research in Endstage and Obstructive Lung Disease Hannover (BREATH), Member of the German Center for Lung Research (DZL), Hannover, Germany. <sup>15</sup>Center of Allergy and Environment (ZAUM), Technical University of Munich and Helmholtz Center Munich, German Research Center for Environmental Health (CPC-M), Member of the German Center of Lung Research (DZL), Munich, Germany. <sup>16</sup>Institute for Medical Biometry and Statistics, University of Lübeck, Lübeck, Germany. <sup>17</sup>Dept of Pediatric Pneumology, Allergology and Neonatology, Hannover Medical School, Hannover, Germany. <sup>18</sup>Biomedical Research in Endstage and Obstructive Lung Disease Hannover (BREATH), Member of the German Center of Lung Research (DZL), Germany. <sup>19</sup>University Children's Hospital, Ludwig Maximilian's University, Munich, Germany. <sup>20</sup>German Research Center for Environmental Health (CPC-M), Member of the German Center of Lung Research (DZL), Munich, Germany. <sup>21</sup>Dept of Paediatric Respiratory Medicine, Inselspital, University Children's Hospital of Bern, University of Bern, Bern, Switzerland. <sup>22</sup>Discipline of Pharmacology, Faculty of Medicine, The University of Sydney, Sydney, Australia.

Corresponding author: Markus Weckmann ([markus.weckmann@uksh.de](mailto:markus.weckmann@uksh.de))

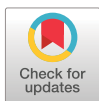

Shareable abstract (@ERSpublications)

**A novel, serological biomarker predicts the anti-IgE therapy response in asthmatics. The neo-epitope biomarker C4Ma3 measures the increase of lung collagen 4 degradation in severe exacerbating type 2 asthma and depends on mast cell chymase activity.** <https://bit.ly/3ejFp7i>

**Cite this article as:** Weckmann M, Bahmer T, Sand JM, *et al.* COL4A3 is degraded in allergic asthma and degradation predicts response to anti-IgE therapy. *Eur Respir J* 2021; 58: 2003969 [DOI: 10.1183/13993003.03969-2020].

This single-page version can be shared freely online.

Copyright ©The authors 2021. For reproduction rights and permissions contact [permissions@ersnet.org](mailto:permissions@ersnet.org)

This article has supplementary material available from [erj.ersjournals.com](http://erj.ersjournals.com)

## Abstract

**Background** Asthma is a heterogeneous syndrome substantiating the urgent requirement for endotype-specific biomarkers. Dysbalance of fibrosis and fibrolysis in asthmatic lung tissue leads to reduced levels of the inflammation-protective collagen 4 (COL4A3).

**Objective** To delineate the degradation of COL4A3 in allergic airway inflammation and evaluate the resultant product as a biomarker for anti-IgE therapy response.

**Methods** The serological COL4A3 degradation marker C4Ma3 (Nordic Bioscience, Denmark) and serum cytokines were measured in the ALLIANCE cohort (paediatric cases/controls: n=134/n=35; adult cases/

Received: 20 April 2020  
Accepted: 28 April 2021

controls: n=149/n=31). Exacerbation of allergic airway disease in mice was induced by sensitising to ovalbumin (OVA), challenge with OVA aerosol and instillation of poly(cytidylic-inosinic). Fulacimstat (chymase inhibitor; Bayer) was used to determine the role of mast cell chymase in COL4A3 degradation. Patients with cystic fibrosis (n=14) and cystic fibrosis with allergic bronchopulmonary aspergillosis (ABPA; n=9) as well as patients with severe allergic uncontrolled asthma (n=19) were tested for COL4A3 degradation. Omalizumab (anti-IgE) treatment was assessed using the Asthma Control Test.

**Results** Serum levels of C4Ma3 were increased in asthma in adults and children alike and linked to a more severe, exacerbating allergic asthma phenotype. In an experimental asthma mouse model, C4Ma3 was dependent on mast cell chymase. Serum C4Ma3 was significantly elevated in cystic fibrosis plus ABPA and at baseline predicted the success of the anti-IgE therapy in allergic, uncontrolled asthmatics (diagnostic OR 31.5).

**Conclusion** C4Ma3 levels depend on lung mast cell chymase and are increased in a severe, exacerbating allergic asthma phenotype. C4Ma3 may serve as a novel biomarker to predict anti-IgE therapy response.
